1 Running Head: DECODING INSTRUCTION FROM SYNCHRONIZED BRAINS

2

3 **Brain-to-brain coupling between instructors and learners discriminates between**  
4 **instructional approaches and predicts learning**

5 Yafeng Pan<sup>1,2</sup>, Suzanne Dikker<sup>3</sup>, Pavel Goldstein<sup>4</sup>, Yi Zhu<sup>1</sup>,  
6 Cuirong Yang<sup>5\*</sup>, and Yi Hu<sup>1\*</sup>

7

8 <sup>1</sup> *School of Psychology and Cognitive Science, East China Normal University,*  
9 *Shanghai, People's Republic of China*

10 <sup>2</sup> *Neuropsychology and Functional Neuroimaging Research Unit (UR2NF), ULB*  
11 *Neuroscience Institute (UNI), Université Libre de Bruxelles, Bruxelles, Belgium*

12 <sup>3</sup> *Department of Psychology, New York University, New York, USA*

13 <sup>4</sup> *School of Public Health, University of Haifa, Haifa, Israel*

14 <sup>5</sup> *Department of Psychology, Suzhou University of Science and Technology, Suzhou,*  
15 *People's Republic of China*

16

17 **Contribution**

18 Y. P., C. Y., and Y. H. designed the experiment. Y. P., Y. Z., and C. Y. performed the  
19 study. Y. P. analyzed the data. Y. P., S. D., P. G., Y. Z., C. Y., and Y. H. wrote the  
20 manuscript.

21

22 **Competing financial interests**

23 The authors declare no competing financial interests.

24

25 **\* Corresponding authors:**

26 Yi Hu: [yhu@psy.ecnu.edu.cn](mailto:yhu@psy.ecnu.edu.cn)

27 Cuirong Yang: [yangsun2004@mail.usts.edu.cn](mailto:yangsun2004@mail.usts.edu.cn)

28

29

30 **Abstract**

31 The neural mechanisms that support naturalistic learning via effective pedagogical  
32 approaches remain elusive. Here we use functional near-infrared spectroscopy to  
33 measure brain activity from instructor-learner dyads simultaneously during  
34 naturalistic conceptual learning. Results show enhanced brain-to-brain coupling  
35 within learner-instructor dyads when the instructor use a scaffolding instruction. Such  
36 coupling enhancement is correlated with learning outcomes, and appears to be driven  
37 by specific scaffolding behaviors on the part of the instructors (e.g., asking guiding  
38 questions or providing hints). Those effects are absent when the instructors produce  
39 explanatory behaviors. Crucially, instructional approaches (scaffolding vs. explanation)  
40 can be successfully decoded based on brain-to-brain coupling, but not when using the  
41 same machine-learning techniques in a single-brain approach. These findings suggest  
42 that brain-to-brain coupling as a pedagogically informative measure tracks the  
43 naturalistic instructional process during instructor-learner interaction throughout  
44 constructive engagement, but not information clarification.

45 **Keywords:** instruction, social interactive learning, brain-to-brain coupling, fNIRS  
46 hyperscanning, scaffolding, explanation, decoding, constructivism

## 47 **1. Introduction**

48 Humans have evolved the ability to learn through social interaction with others (e.g.,  
49 an instructor), an important skill that serves us throughout our lifespan (Verga and  
50 Kotz, 2019; Pan et al., 2018). Such interactive learning is thought to be facilitated by  
51 instructional tools (Driscoll and Driscoll, 2005), like demonstrating rules or providing  
52 examples for practice. Verbal instruction has been shown to play an enabling and  
53 modulatory role in learning at multiple levels, ranging from functional brain  
54 re-organization (e.g., Hartstra et al., 2011; Olsson and Phelps, 2007; Ruge and  
55 Wolfensteller, 2009) to learning performance optimization (e.g., Clark and Mayer,  
56 2016; Wolfson et al., 2014). However, despite the dynamic and interactive nature of  
57 instruction-based learning, neurobiological research investigating learning through  
58 instruction has been mostly limited to controlled laboratory studies – stripped from  
59 any real-time interaction between the learner and the instructor (e.g., Ruge and  
60 Wolfensteller, 2009) – and have often ignored the role of different instruction  
61 approaches (e.g., Holper et al., 2013). As a result, the brain mechanisms that support  
62 dynamic interactive learning remain understudied, and thus poorly understood.

63 Recent methodological advances (Brockington et al., 2018; for a review, see  
64 Hasson et al., 2012) have allowed researchers to begin investigating the neural basis  
65 of naturalistic instruction-based learning (Bevilacqua et al., 2019; Dikker et al., 2017;  
66 Liu et al., 2019; Pan et al., 2018). These studies have suggested that the interaction  
67 between instructor and learner is reflected in the extent to which brain activity  
68 becomes ‘coupled’ between them (Bevilacqua et al., 2019; Holper et al., 2013; Pan et  
69 al., 2018; Zheng et al., 2018). For example, brain-to-brain coupling has been reported  
70 to reliably predict the success of social interactive learning (Pan et al., 2018).  
71 However, while some studies have shown such a relationship between brain-to-brain  
72 coupling and learning outcomes (e.g., Holper et al., 2013; Liu et al., 2019; Pan et al.,  
73 2018; Zheng et al., 2018), others did not in fact observe a correlation between  
74 teacher-student brain-to-brain coupling and content retention (e.g., Bevilacqua et al.,  
75 2019). One potential limitation of most prior studies on learning concerns that they

76 only focused on the average brain-to-brain coupling across the entire teaching session  
77 and its relation with learning outcomes (Davidesco et al., 2019). It is possible that  
78 linking specific moments of brain-to-brain coupling (such as those associated with  
79 certain instructional behavior) to learning might yield complementary useful  
80 information (Pan et al., 2018).

81 Here, we further investigated the functional significance of brain-to-brain  
82 coupling in learning and instruction. In addition to examining whether brain-to-brain  
83 coupling between instructors and learners can predict learning outcomes, we asked  
84 whether brain-to-brain coupling can be used to classify instructional dynamics during  
85 interactive learning. Such a finding would suggest that brain-to-brain coupling may be  
86 a pedagogically informative implicit measure that tracks learning throughout ongoing  
87 dynamic instructor-learner interactions.

88 We distinguished two instructional strategies (explanation vs. scaffolding),  
89 derived from two distinct pedagogical approaches to the role of instruction in  
90 instructor-learning interactions. First, the “explanation-based” approach assumes that  
91 learning emerges as a result of information clarification, which serves to enhance  
92 learners’ comprehension (Chi, 2013; Duffy et al., 1986). In this framework,  
93 instructional modulation of learning is driven by meaningful explanatory information.  
94 A second line of instructional approaches emphasizes the importance of supportive  
95 scaffoldings provided by the instructor. Scaffolding behaviors include asking key  
96 questions (e.g., asking learners their understanding of a core concept) and providing  
97 hints (e.g., giving an analogy of the learning content) that are aimed at redirecting  
98 learners’ actions and understanding (Van de Pol et al., 2010). Scaffolding foregrounds  
99 bidirectional communication and information sharing – both instructors and learners  
100 are involved in a two-way dynamic process of receiving and sending out information.

101 In addition to instructional strategy, adaptive behavior on the part of the instructor  
102 has also been shown critical for interactive learning (Chi, 2013; Chi and Roy, 2010).  
103 That is, the instructor provides personalized guidance based on the learner’s current  
104 level of knowledge (Wass and Golding, 2014). We therefore added a second  
105 dimension to our study design where half of the instructors were informed of the

106 learner's knowledge level based on their performance on a pre-test (personalized  
107 instruction) and half of them were not informed (non-personalized instruction).

108 Twenty-four instructor-learner dyads participated in a concept learning task,  
109 during which their brain activity was recorded simultaneously with functional  
110 near-infrared spectroscopy (fNIRS; Cheng et al., 2015; Pan et al., 2017; Zheng et al.,  
111 2018). Brain-to-brain coupling between instructors and learners was first estimated  
112 using Wavelet Transform Coherence (Grinsted et al., 2004), and then correlated with  
113 learning outcomes. A video coding analysis allowed us to parse whether the  
114 brain-to-brain coupling in instructor-learner dyads was specifically driven by certain  
115 instructional behavior. Finally, to identify to what extent scaffolding strategies can be  
116 distinguished from explanation strategies in the neural data, we used a decoding  
117 analysis. We employed the same decoding approach on both brain-to-brain coupling  
118 and individual brain data to explore the possible added value of a two-brain vs.  
119 single-brain analysis.

## 120 **2. Results**

### 121 **2.1. Participants and procedure**

122 Forty-eight healthy participants were assigned either the role of instructor or learner,  
123 forming 24 instructor-learner dyads. Instructor-learner dyads took part in two fNIRS  
124 experimental blocks, in a counterbalanced order (**Figs. 1A&B**): (i) teaching with the  
125 scaffolding strategy, and (ii) teaching with the explanation strategy. During each block,  
126 the instructor taught psychological concepts to the learner (*see Methods for more*  
127 *details*). Prior to the fNIRS scanning, half of the instructors were informed of the  
128 learner's current knowledge level (personalized instruction) while half of them were  
129 not (non-personalized instruction). Immediately before and after the fNIRS scanning,  
130 learners' content knowledge was evaluated. Brain imaging data from prefrontal and  
131 temporoparietal regions were collected from the instructor and the learner  
132 simultaneously (**Figs. 1A&C**), starting with a resting-state phase (baseline)  
133 immediately followed by the interactive-learning phase (task). Brain-to-brain coupling

134 was computed within each instructor-learner dyad (**Fig. 1D**).

135

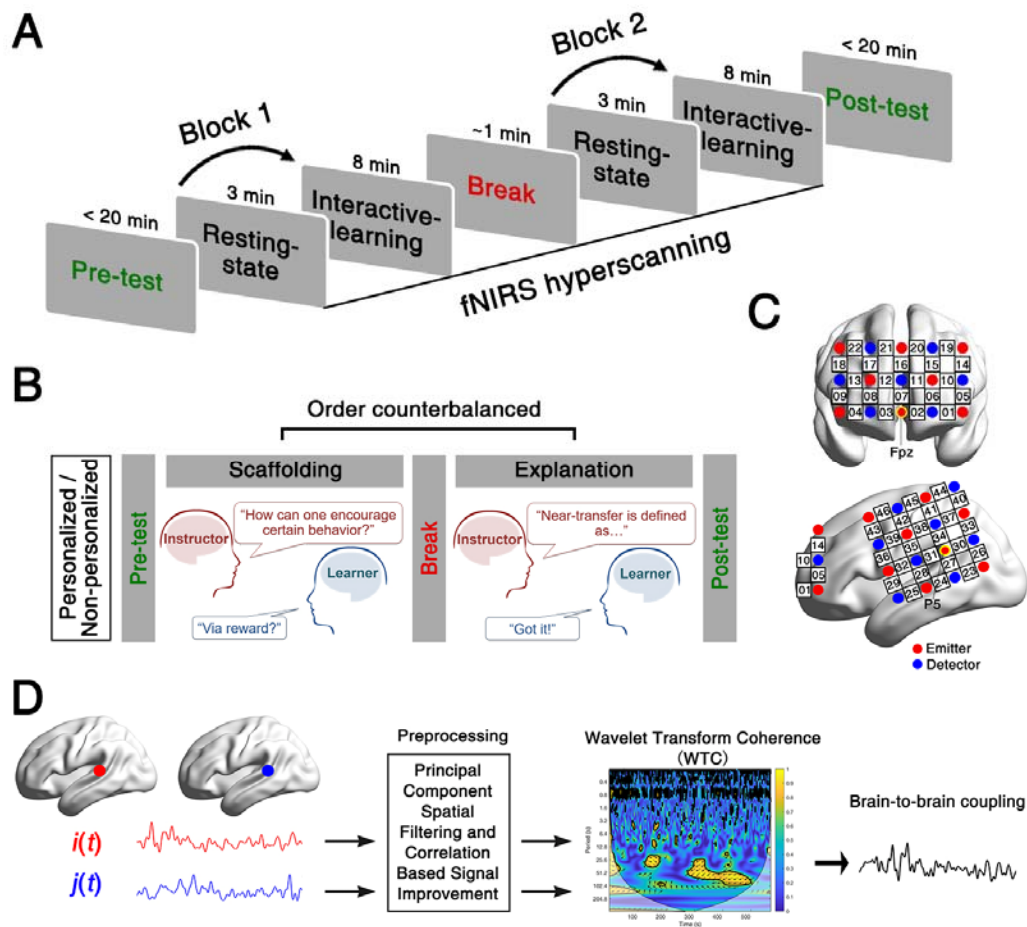

136

137 **Figure 1.** Experimental protocol, probe location, and brain-to-brain coupling analysis. (A)

138 Experimental procedure. Before and after scanning, learners' knowledge of the psychological concepts

139 was evaluated. Brain activity from the instructor and the learner were acquired simultaneously using

140 fNIRS, in two blocks, each starting with a 3-min rest (resting-state phase/baseline), followed by the

141 instructor teaching concepts to the learner (interactive-learning phase/task). (B) Instructional

142 Personalization and Instructional Strategies. Participants were randomly allocated to either

143 personalized or non-personalized groups (Instructional Personalization). Within each instructor-learner

144 dyad, scaffolding and explanation strategies were compared. (C) Optode probe set. The set was placed

145 over prefrontal and left temporoparietal regions. (D) Overview of the brain-to-brain coupling analysis.

146 Channel-wise raw time courses were extracted from both the instructor and the learner. After a battery

147 of preprocessing, brain-to-brain coupling was estimated by Wavelet Transform Coherence between the

148 two clean time courses.  $i, j$ , fNIRS signals of two participants of a dyad;  $t$ , time.

## 149 2.2. Behavioral performance

150 A repeated measures ANOVA on learning outcomes with Instructional Strategy  
151 (Scaffolding vs. Explanation) as a within-dyad factor and Instructional  
152 Personalization (Personalized vs. Non-personalized) as a between-dyad factor  
153 revealed a main effect of Instructional Strategy ( $F_{(1, 24)} = 5.10, p = 0.03, \eta_{\text{partial}}^2 = 0.19$ ),  
154 with the scaffolding strategy showing better learning outcomes than the explanation  
155 strategy (**Fig. 2**). There was no effect of Instructional Personalization on learning ( $F_{(1,$   
156  $24) = 0.82, p = 0.38$ ) and there was no interaction between Instructional  
157 Personalization and Instructional Strategy ( $F_{(1, 24)} = 0.07, p = 0.79$ ). In sum, learners  
158 who were taught using scaffolding retained more content from the instruction than  
159 learners who were taught using an explanation-based instructional strategy.

160

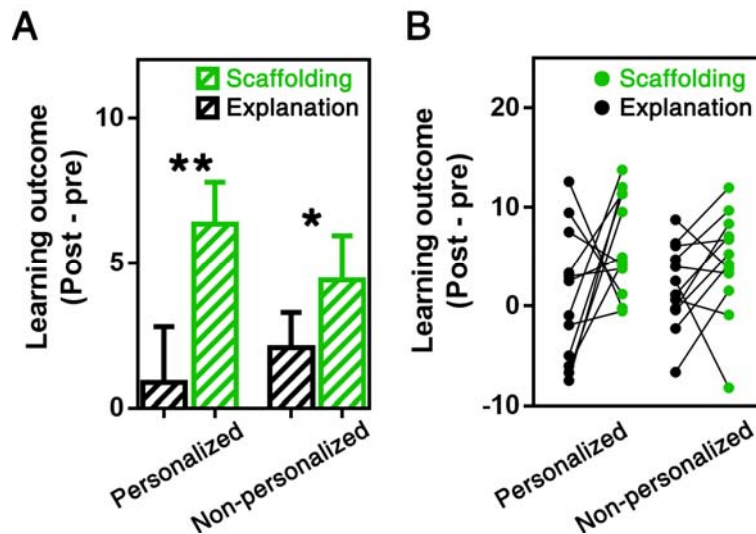

161

162 **Figure 2.** Learning outcomes in all conditions. (A) Group levels: in both personalized and  
163 non-personalized groups, learning outcomes for the scaffolding condition was significantly higher than  
164 the explanation condition. Learning outcomes are indexed by the change score (post-test score minus  
165 pre-test score). Error bars represent standard errors of the mean. (B) Corresponding graph for  
166 individual levels. \* $p < 0.05$ . \*\* $p < 0.01$ .

## 167 **2.3. Brain imaging results**

### 168 **2.3.1. Interactive learning induces frequency-specific widespread brain-to-brain** 169 **coupling**

170 In a first-pass data-driven analysis, we calculated brain-to-brain coupling in all  
171 conditions across the whole sample of 24 participant dyads to test whether interactive  
172 learning (i.e., task) was associated with enhanced brain-to-brain coupling compared to  
173 the resting-state session (i.e., baseline).

174 In terms of frequency characteristics, brain-to-brain coupling was significantly  
175 higher during the interactive learning phase than during rest for frequencies ranging  
176 between 0.45 – 0.57 Hz and 0.17 – 0.27 Hz (all FDR-corrected, **Fig. 3**). These two  
177 ranges were then chosen as frequencies of interest (FOIs) for subsequent analyses.  
178 These FOIs are out of the range of physiological responses associated with cardiac  
179 pulsation activity (~ 0.8 – 2.5 Hz) and spontaneous blood flow oscillations (i.e.,  
180 Mayer waves, ~ 0.1 Hz).

181 Regarding spatial characteristics, task-related coupling enhancement was highest  
182 in the orbitofrontal cortex, frontopolar cortex, and inferior frontal cortex at 0.45 – 0.57  
183 Hz (**Fig. 3C**), and along superior temporal cortex, temporoparietal junction, and  
184 superior parietal lobule at 0.17 – 0.27 Hz (**Fig. 3D**). We also observed widespread  
185 brain-to-brain coupling in adjacent regions, including prefrontal, temporal, and  
186 parietal areas. These results replicate previous research showing that social interactive  
187 learning (through instruction) induces brain-to-brain coupling in high-order brain  
188 regions (Holper et al., 2013; Pan et al., 2018; Zheng et al., 2018).

189 A control analysis confirmed that the patterns of brain-to-brain coupling (higher  
190 coupling associated with interactive learning compared to rest) were specific to the  
191 interaction between real instructor-learner dyads: pseudo dyads did not show higher  
192 brain-to-brain coupling during learning than rest ( $ps > 0.05$ , FDR controlled, **Fig. 3E**).  
193 Together, our first-pass results suggest that social interactive learning induces  
194 widespread brain-to-brain coupling. This coupling is concentrated in specific



195 frequencies and only emerges in ‘real’ dyads (who are actually interacting).  
 196

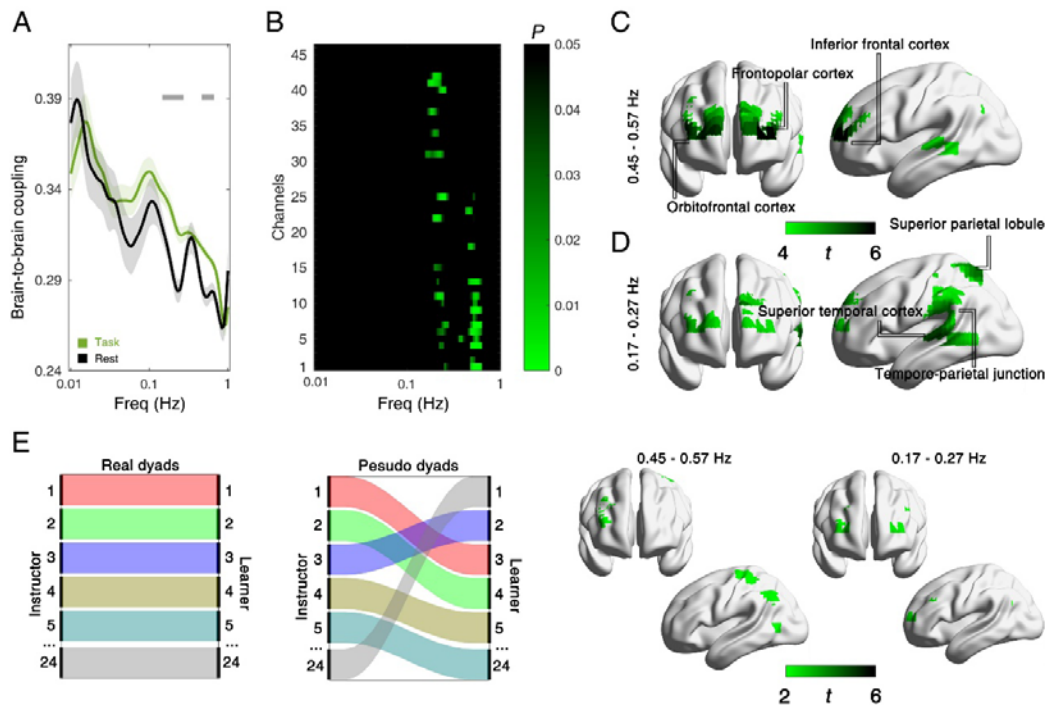

197  
 198 **Figure 3.** Interactive learning evokes frequency-specific widespread brain-to-brain coupling across all  
 199 conditions. (A) Brain-to-brain coupling associated with the instruction session and the rest session for  
 200 frequencies ranging between 0.01 and 1 Hz (all participants and channels’ data were averaged). Grey  
 201 horizontal lines on the top indicate which frequencies show statistical differences (FDR controlled). (B)  
 202 An FDR-corrected *P*-value map resulting from comparisons between instruction and rest (for each  
 203 channel) across frequencies between 0.01 and 1 Hz. Interactive learning evokes frequency-specific  
 204 widespread brain-to-brain coupling in all conditions across all dyads at 0.45 – 0.57 Hz (C) and 0.17 –  
 205 0.27 Hz (D). (E) Control analyses confirmed that the enhanced brain-to-brain coupling shown in (C)  
 206 and (D) was dyad-specific: no significant task-related coupling was detected in pseudo-dyads in either  
 207 frequency band of interest (all real dyads were shuffled, resulting in 24 new pseudo dyads).

208 **2.3.2. Instruction modulates brain-to-brain coupling within instructor-learner**  
 209 **dyads**

210 Having established that social interactive learning is associated with a significant  
 211 increase in brain-to-brain coupling between instructor and learner, we next sought to

212 determine whether such coupling enhancement was modulated by Instructional  
213 Strategy and Instructional Personalization. First, results showed a main effect of  
214 Instructional Strategy in prefrontal regions (i.e., CHs 5, 6, 10, 12) at 0.45 – 0.57 Hz  
215 ( $F_s > 9.50$ , FDR corrected  $ps < 0.05$ ). Further analyses revealed that the scaffolding  
216 strategy exhibited higher brain-to-brain coupling than the explanation strategy in all  
217 significant CHs (**Fig. 4A**). There were no effects of Instructional Strategy for other  
218 CHs and other frequency bands ( $ps > 0.05$ , FDR corrected). There was no significant  
219 main effect of Instructional Personalization in any CHs and at any frequency bands  
220 ( $ps > 0.05$ , FDR corrected).

221 We did, however, observe an interaction between Instructional Strategy and  
222 Instructional Personalization in the superior temporal cortex (i.e., CH 25) at 0.17 –  
223 0.27 Hz ( $F_{(1, 24)} = 13.49$ , FDR corrected  $p < 0.05$ ). Post hoc comparisons indicated  
224 that brain-to-brain coupling was significantly larger for the scaffolding condition than  
225 the explanation condition in the personalized group ( $p < 0.05$ ), but not in the  
226 non-personalized group ( $p > 0.05$ , **Fig. 4B**). No significant main effects or interactions  
227 were observed in any other CHs or frequency bands of interest ( $ps > 0.05$ , FDR  
228 corrected).

229 Average brain-to-brain coupling in prefrontal regions was positively correlated  
230 with learning outcomes in the scaffolding condition ( $r = 0.65$ ,  $p = 0.001$ ; **Fig. 4A**,  
231 right panel) but not in the explanation condition ( $r = -0.24$ ,  $p = 0.27$ ), indicating that  
232 better learning was associated with stronger brain-to-brain coupling in the scaffolding  
233 condition alone. Mirroring the ANOVA results reported above, we saw that  
234 brain-to-brain coupling in superior temporal cortex only predicted learning outcomes  
235 in the personalized scaffolding condition ( $r = 0.66$ ,  $p = 0.02$ ; all other conditions:  $rs <$   
236  $-0.18$ ,  $ps > 0.27$ ; **Fig. 4B**, right).

237

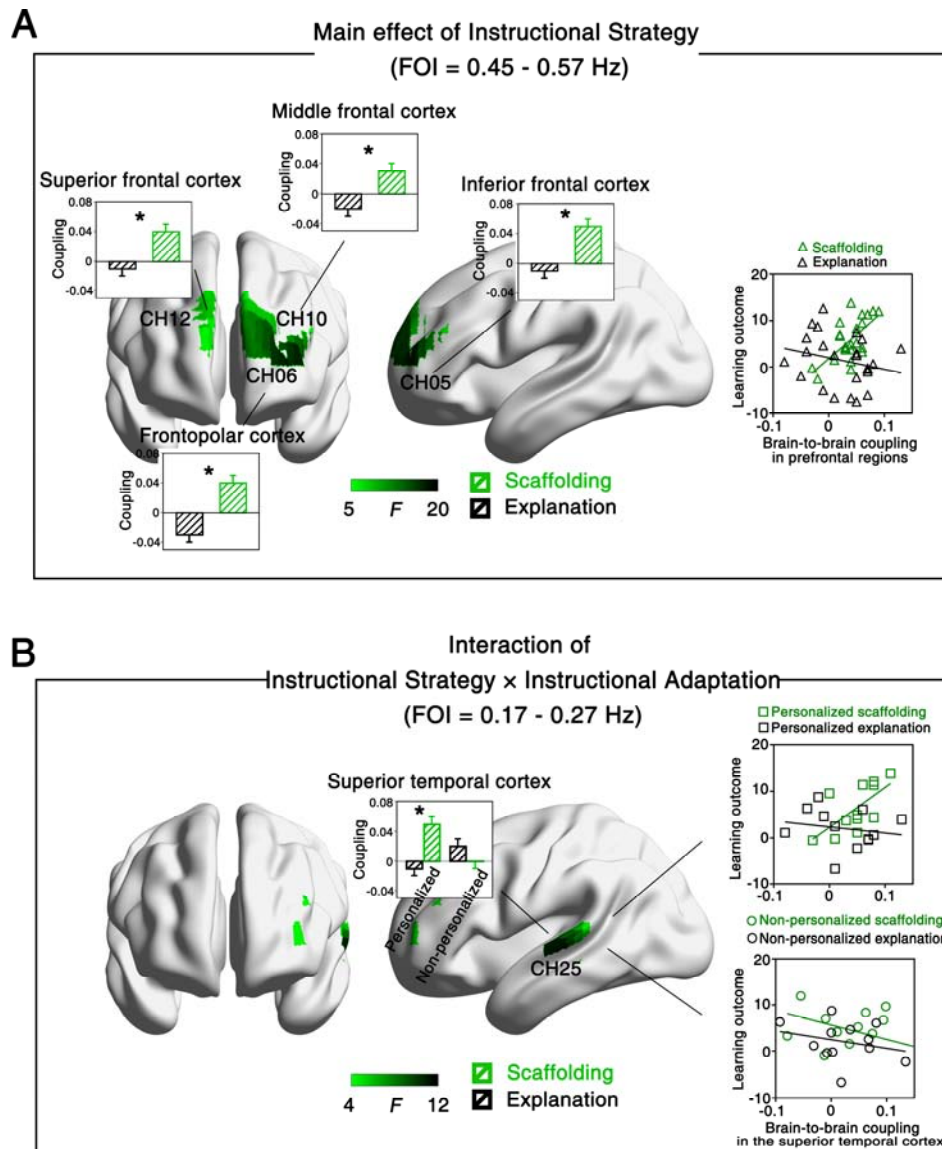

238

239 **Figure 4.** Instruction modulates brain-to-brain coupling during social interactive learning. Central:  
 240 *F*-test maps of brain-to-brain coupling generated based on frequency-specific ANOVAs with  
 241 Instructional Strategy and Instructional Personalization as independent variables. (A) The scaffolding  
 242 condition showed higher brain-to-brain coupling in prefrontal regions than the explanation condition.  
 243 Such brain-to-brain coupling predicted learning outcomes in the scaffolding condition, but not in the  
 244 explanation condition (right panel). (B) The scaffolding condition also led to significantly larger  
 245 brain-to-brain coupling in superior temporal cortex than the explanation condition, but only in the  
 246 personalized instruction dyads. Brain-to-brain coupling predicted learning outcomes in the personalized  
 247 scaffolding condition but not in other conditions (right panel). \**p* < 0.05. Error bars indicate standard  
 248 errors of the mean.

### 249 2.3.3. Linking instructional behaviors with brain-to-brain coupling

250 To investigate how instructional behaviors contributed to brain-to-brain coupling, we  
251 conducted a video coding analysis for each participant dyad. Two raters independently  
252 coded videos for scaffolding behaviors vs. non-scaffolding instructional behaviors (or  
253 explanatory behaviors vs. non-explanatory instructional behaviors). For analysis, time  
254 courses of brain-to-brain coupling during the task session were first matched with  
255 video-coded instructional behaviors (**Figs. 5A–C**). Brain-to-brain coupling was then  
256 extracted for segments of each type of instructional behavior and averaged for each  
257 condition. Task-related coupling was then obtained by subtracting time-averaged  
258 brain-to-brain coupling during the rest session from the averaged coupling segments  
259 during the task session (**Figs. 5D&E**).

260 First, we examined whether task-related brain-to-brain coupling in prefrontal  
261 cortex detected in the scaffolding condition could be explained by scaffolding  
262 behaviors. Indeed, scaffolding behaviors induced significantly higher brain-to-brain  
263 coupling compared to the non-scaffolding instructional behaviors ( $t_{(23)} = 2.72$ ,  $p =$   
264  $0.01$ , Cohen's  $d = 0.78$ ; **Fig. 5D**, upper panel). Crucially, we also compared. However,  
265 no significant differences in brain-to-brain coupling were seen between explanatory  
266 behaviors and non-explanatory instructional behaviors in the explanation condition  
267 ( $t_{(23)} = 1.58$ ,  $p = 0.13$ ; **Fig. 5D**, lower panel).

268 Second, we compared brain-to-brain coupling for scaffolding vs. non-scaffolding  
269 instructional behaviors to test whether scaffolding behavior indeed drove the  
270 task-related brain-to-brain coupling observed in superior temporal cortex for the  
271 personalized scaffolding condition. As expected, scaffolding behaviors exhibited  
272 larger brain-to-brain coupling than non-scaffolding instructional behaviors ( $t_{(11)} = 3.19$ ,  
273  $p = 0.01$ , Cohen's  $d = 1.18$ ; **Fig. 5E**, upper panel). In contrast, just like in prefrontal  
274 cortex, brain-to-brain coupling did not differ between explanatory behaviors and  
275 non-explanatory behaviors in the personalized explanation condition ( $t_{(11)} = 0.91$ ,  $p =$   
276  $0.38$  (**Fig. 5E**, lower panel). Moreover, there was no significant difference between  
277 instructional behaviors in either non-personalized scaffolding (**Fig. 5F**, upper panel)

278 or non-personalized explanation conditions (**Fig. 5F**, lower panel,  $t_s < 1.36$ ,  $p_s >$   
279 0.20).

280       Importantly, the effects reported here cannot be attributed to differences between  
281 conditions in terms of the mere quantity of instructional behaviors or the number of  
282 turn-takings, as evidenced by two control analyses. First, we calculated the duration  
283 ratio of instructional behaviors by quantifying the proportions of time (out of 8  
284 minutes) when instructional behaviors occurred (Jiang et al., 2015; Pan et al., 2018).  
285 For example, if scaffolding behaviors occurred for a total of 3 minutes in an  
286 instructor-learner dyad, then the duration ratio of scaffolding behaviors should be  $3/8$   
287  $= 0.375$ . Results revealed that the duration ratio was comparable between scaffolding  
288 behaviors ( $0.56 \pm 0.18$ ) and non-scaffolding instructional behaviors ( $0.44 \pm 0.18$ ) in  
289 the scaffolding condition ( $t_{(23)} = 1.22$ ,  $p = 0.25$ ). Second, we compared the cumulative  
290 number of sequential turn-takings during interactive learning (for example, one  
291 turn-taking event could be that the instructor asks one question, followed by the  
292 answer from the learner). Results showed that the scaffolding strategy involved  
293 marginally more turn-takings than the explanation strategy ( $16.67 \pm 6.54$  vs.  $12.08 \pm$   
294  $3.15$ ;  $t_{(23)} = 2.11$ ,  $p = 0.06$ ). No significant correlation between the number of  
295 turn-takings and brain-to-brain coupling was detected ( $r_s < 0.42$ ,  $p_s > 0.18$ ).

296       In sum, brain-to-brain coupling could be explained by dynamic scaffolding  
297 behavior implemented in the instructor-learner interaction. Our complementary  
298 analyses ruled out frequency of instructional behaviors or turn-taking behavior as  
299 possible contributors to the observed brain-to-brain coupling effects.

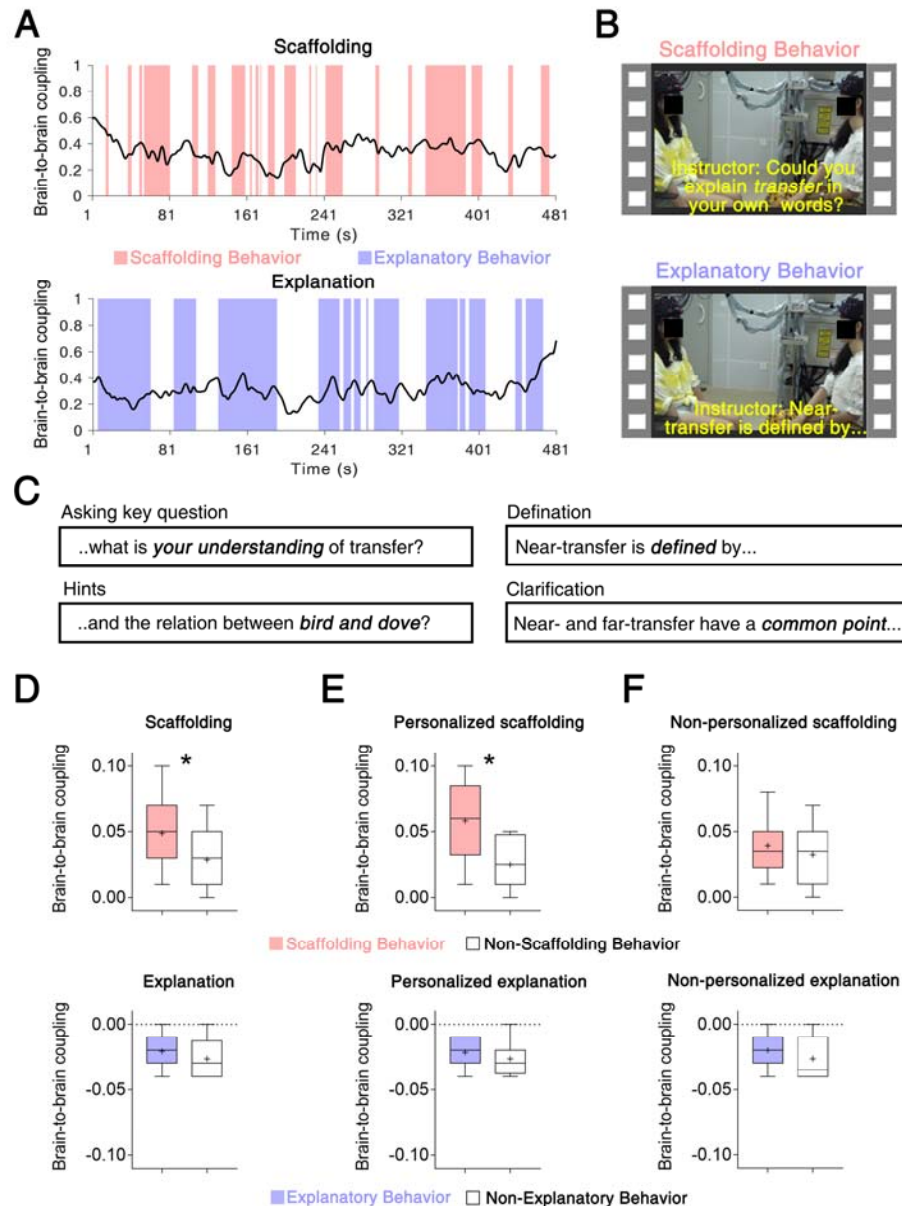

300

301 **Figure 5.** Video coding analysis reveals that brain-to-brain coupling is driven by specific instructional  
 302 behaviors. (A) Time course of brain-to-brain coupling in the learning phase for one randomly selected  
 303 dyad from the scaffolding and explanation conditions. Vertical panels denote the instructional behaviors:  
 304 red panels indicate scaffolding behaviors; blue ones indicate explanatory behaviors. (B) Examples of  
 305 each instructional behavior as coded from the video frames. (C) Example sentences from the video  
 306 coding analysis for scaffolding behaviors (asking key questions and providing hints) and explanation  
 307 behaviors (definition and clarification). Box plots of task-related brain-to-brain coupling (task minus  
 308 rest) across the instructional behaviors in the scaffolding and explanation conditions (D), in the



309 personalized scaffolding and personalized explanation conditions (**E**), and in the non-personalized  
310 scaffolding and non-personalized explanation conditions (**F**). Crosses indicate the average  
311 brain-to-brain coupling across participant dyads. Error bars range from the min to the max value  
312 observed.  $*p < 0.05$ .

### 313 **2.3.4. Decoding instructional strategy from brain-to-brain coupling**

314 Finally, we tested the extent to which one can identify the Instructional Strategy  
315 employed by an instructor (i.e., *scaffolding* or *explanation*) based on task-related  
316 brain-to-brain coupling alone. Brain-to-brain coupling was extracted from all channel  
317 combinations that showed significantly higher brain-to-brain coupling for task vs.  
318 baseline to train the classifiers. The classifier successfully distinguished instructors  
319 who employed the *scaffolding* or *explanation* strategy with an Area Under the Curve  
320 (AUC) of 0.90, i.e., significantly exceeding chance ( $p < 0.0001$ , **Fig. 6A**). The  
321 decoding analysis based on task-related brain-to-brain coupling further showed that  
322 the classifier was able to distinguish instructors who employed the *scaffolding* or  
323 *explanation* strategy for the personalized condition (AUC = 0.84;  $p = 0.005$ , **Fig. 6B**),  
324 but not in the non-personalized condition (AUC = 0.66;  $p = 0.17$ , **Fig. 6C**).

325 Importantly, when using individual brain activation from either instructors' or  
326 learners' as classification features, classification performance to discriminate between  
327 the *scaffolding* and *explanation* strategies was low (AUCs  $< 0.66$ ,  $ps > 0.05$ ). The  
328 decoding analysis based on the individual brain activation was also insufficient to  
329 distinguish the *scaffolding* and *explanation* strategies for both personalized (AUCs  $<$   
330  $0.57$ ,  $ps > 0.35$ ) and non-personalized conditions (AUCs  $< 0.56$ ,  $ps > 0.20$ ).

331 Taken together, these results indicate that brain-to-brain coupling, as a novel yet  
332 promising neural-classification feature (Jiang et al., 2015), was suitable for decoding  
333 instructional strategy with a reasonable classification performance, particularly when  
334 the instruction was tailored to the learner (i.e., personalized vs. non-personalized).  
335 Brain-to-brain coupling further served as a better classification feature compared to  
336 individual brain activation during instructor-learner interactions.

337

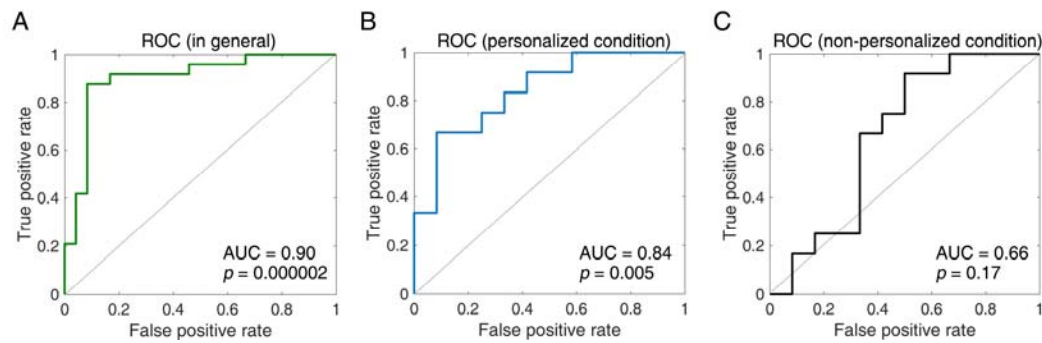

338

339 **Figure 6.** Decoding performance. The receiver operating characteristic (ROC) curve for classification  
340 distinguishing the *scaffolding* or *explanation* strategy in general (A), in the personalized (B), and  
341 non-personalized conditions (C). Area under the curve (AUC) was calculated. Significant levels were  
342 calculated by comparing the correct AUC from the real labels with 10000 renditions of randomized  
343 labels.

### 344 3. Discussion

345 This study investigated how verbal instruction modulates interactive learning using an  
346 fNIRS-based hyperscanning approach, which allowed us to record brain activity from  
347 both instructors and learners *during* an instruction exchange. Twenty-four  
348 instructor-learner dyads performed a conceptual learning task in a naturalistic  
349 instruction situation where a well-trained instructor taught a learner a set of  
350 psychological concepts. We found that interactive learning induced task-related  
351 brain-to-brain coupling. Brain-to-brain coupling co-varied with learners' subsequent  
352 learning outcomes and was significantly higher when instructors employed  
353 scaffolding tactics (e.g., asking key questions and hinting) than when they used an  
354 explanation-based teaching approach. This brain-to-brain coupling associated with  
355 scaffolding was especially prominent if instructors were informed of the learner's  
356 knowledge level in advance. Finally, different instructional strategies could  
357 successfully be decoded based on brain-to-brain coupling alone, but, crucially, not  
358 based on individual brain activation.

359 Importantly, our findings were specific to the interacting instructor-learner dyads



360 (control analysis #1) and they did not reflect the mere quantity of instructional  
361 behaviors (control analysis #2), nor the amount of turn-takings between instructor and  
362 learner (control analysis #3).

### 363 **3.1. Using two brains to study learning and instruction**

364 Educators have long debated which method of instruction is most conducive to  
365 learning. Several researchers have sought an answer to this question by studying  
366 learners' neural activity during both information encoding and retrieval. However,  
367 previous studies have primarily focused on isolated individuals (e.g., Hartstra et al.,  
368 2011; Olsson and Phelps, 2007; Ruge and Wolfensteller, 2009). This poses a  
369 limitation to obtaining full insight into the learner process, especially for  
370 instruction-based learning, which relies on the dynamic instructional interaction  
371 between instructor and learner. A “second-person approach” (also termed as  
372 “hyperscanning”, i.e., measuring two brains simultaneously, Redcay and Schilbach,  
373 2019) provides a possible way to fill this knowledge gap.

374 The second-person approach allowed us to quantify brain-to-brain coupling  
375 between the instructor and the learner, and possibly capture the continuous,  
376 meaningful alignment of interpersonal neural processes. It has been proposed that  
377 such neural alignment facilitates the matching of the temporal structure of inputs and  
378 optimizes the learning process (Leong et al., 2017). Our findings suggest that  
379 brain-to-brain synchrony is pedagogically relevant. First, brain-to-brain coupling was  
380 correlated with learning outcomes, strongly indicating its functional significance.  
381 Second, brain-to-brain coupling was successfully used to decode instructional  
382 approaches with a good classification performance.

383 To our knowledge, we are the first to use activity from two brains as opposed to  
384 one to decode instructional strategies. We found that brain-to-brain coupling served as  
385 a better neural-classification feature in contrast with individual brain activity. This  
386 finding was in line with recent advances; for example, a recent study found that  
387 brain-to-brain coupling yielded higher predictive power for learning outcomes

388 compared to single-brain measures (Davidesco et al., 2019). A possible explanation  
389 for this is that non-neuronal artifacts are systematic in individual brain activity (Zhang  
390 et al., 2016), while such artifacts are not consistent across brains. Indeed,  
391 brain-to-brain coupling has been reported to have higher signal-to-noise than  
392 single-brain measures (Parkinson et al., 2018). Moreover, measuring coupling across  
393 brains can provide complementary information that cannot be revealed by  
394 conventional individual brain measures (Balconi et al., 2017; Simony et al., 2016).  
395 Compared to single-brain activity, brain-to-brain coupling could be more sensitive  
396 when tracking ongoing social interactions because it considers the neural dynamics  
397 from all interacting agents simultaneously. In sum, there are several benefits of  
398 recording activity from two brains (versus one brain) to study learning and instruction.

### 399 **3.2. The role of prefrontal and temporal cortices in brain-to-brain coupling**

400 The modulatory effects of instruction on brain-to-brain coupling were concentrated in  
401 prefrontal and superior temporal cortices. This is in line with prior fNIRS-based  
402 hyperscanning studies that found that brain-to-brain coupling in prefrontal cortices  
403 (PFC; Holper et al., 2013; Pan et al., 2018; Takeuchi et al., 2017) and temporoparietal  
404 regions (Zheng et al., 2018) predicted learning outcomes following instruction. PFC  
405 has been associated with a wide range of human cognitive functions. Specific to  
406 hyperscanning, PFC has been implicated in cooperation (Cheng et al., 2015),  
407 competition (Liu et al., 2015), and emotion regulation (Reindl et al., 2018). In this  
408 study, the scaffolding process might require constant collaborative interaction between  
409 instructor and learner, a process for which prefrontal areas are heavily recruited.

410 Superior temporal cortex (STC), like PFC, has been associated with many  
411 cognitive functions that are relevant for learning, and social cognition more broadly.  
412 For example, STC is a key area for theory of mind or mentalizing (Baker et al., 2016),  
413 and has been implicated in social perception and action observation (Thompson and  
414 Parasuraman, 2012). While the exact role of STC in brain-to-brain coupling during  
415 learning cannot be inferred based on the present findings, it is possible that

416 brain-to-brain coupling in this area reflects the shared intentionality or mental state  
417 between instructor and learner, or a process whereby instructors need to infer the  
418 understanding of the learner such that instruction can be adapted or personalized  
419 accordingly (Zheng et al., 2018).

420 Another possibility is that the correlation between brain-to-brain synchrony and  
421 learning outcomes in STC and PFC can be accounted for in terms of the ability of the  
422 instructor and learner to predict each other's mental states and utterances throughout  
423 the interaction. Prior fMRI studies investigating speaker-listener brain-to-brain  
424 coupling found that brain activity was more correlated between speakers and listeners  
425 in STC for more predictable speech (Dikker et al., 2014) and PFC brain-to-brain  
426 coupling has been associated with information retention (Stephens et al., 2010). Both  
427 PFC and STC have been found crucial for temporal predictive encoding and  
428 integration of behavior (Amoruso et al., 2018; Yang et al., 2015) and recent models  
429 attribute a large role to predictive coding in explaining interpersonal alignment at both  
430 the neural and the behavioral level (Garrod and Pickering, 2010; Shamay-Tsoory et al.,  
431 2019).

### 432 **3.3. Linking brain imaging findings to pedagogical practice**

433 As the Chinese educator Confucius suggested, appropriate instruction matters during  
434 instructor-learner interactive learning (Chen, 2007). Several theoretical models have  
435 been proposed aiming at improving pedagogy. These models include  
436 explanation-based and constructivism-based theories, both of which have been shown  
437 demonstrated to support learning (Chi, 2013).

438 As laid out in the introduction, an explanation-based approach puts emphasis on  
439 information clarification and aims at providing prefabricated explanatory information  
440 to the learner. Explanation is a conventional strategy used in classroom instruction  
441 (Leinhardt and Steele, 2005), human tutoring (Chi et al., 2004), cooperative learning  
442 (Webb et al., 2006), and skill acquisition (Renkl et al., 2007). In a  
443 constructivism-based approach, in contrast, the instructor is encouraged to provide

444 support (i.e., scaffolding) tailored to the needs of the learner (Kleickmann et al., 2016).  
445 In this framework, instructional modulation of learning arises from exogenous  
446 constructivist instruction (Jumaat and Tasir, 2016). Arguably, our findings favor a  
447 constructivism-based model: brain-to-brain coupling during interactive learning was  
448 primarily driven by the moments of scaffolding behaviors, a central feature of a  
449 constructivist approach to instruction-based learning. It is important to note that our  
450 results do not warrant the conclusion that explanation-based instruction is not useful:  
451 This would go against decades of research showing that people do learn from  
452 explanations (Chi et al., 2004; Leinhardt and Steele, 2005; Renkl et al., 2007; Webb et  
453 al., 2006).

454 Our findings can also be interpreted within the context of the  
455 *Interactive-Constructive-Active-Passive* (ICAP, Chi and Wylie, 2014) framework. The  
456 ICAP framework defines a set of cognitive engagement activities, which can be  
457 categorized into *Interactive*, *Constructive*, *Active*, and *Passive* modes, based on  
458 learners' behaviors. The four modes correspond to different cognitive processes (Lam  
459 and Muldner, 2017): *Interactive* engagement corresponds to the cognitive process of  
460 co-creating knowledge (e.g., dialogues); *Constructive* engagement involves creating  
461 knowledge (e.g., explaining in one's own words); *Active* engagement involves  
462 emphasizing or selecting knowledge (e.g., copying notes); *Passive* engagement  
463 involves storing knowledge (e.g., watching and listening to the instructor). The ICAP  
464 hypothesis proposes that the learning increase from *Passive* to *Active* to *Constructive*  
465 to *Interactive*. In the current study, although both strategies involved interactive  
466 engagement, the scaffolding strategy could additionally invoke constructive  
467 engagement whereas the explanation strategy could invoke relatively passive  
468 engagement in the learners (as summarized in **Fig. 7**). Consistent with the ICAP,  
469 learning outcomes were better in the scaffolding than the explanation strategies, i.e.,  
470  $(Interactive + Constructive) > (Interactive + Passive)$ . What's more, one can argue  
471 that our results extend the theoretical framework of ICAP by showing that the four  
472 components proposed should not be treated in isolation: real-life instruction is a  
473 complex activity and generally engages several cognitive components. Our findings

474 suggest that instructors should consider including and combining more interactive and  
475 constructive engagements.

476

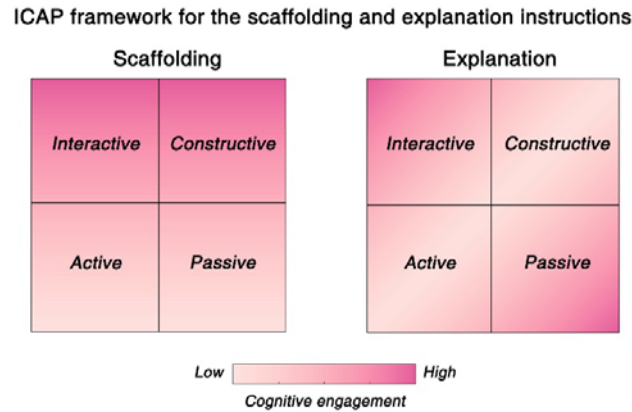

477

478 **Figure 7.** Interactive-Constructive-Active-Passive (ICAP) framework for the scaffolding and  
479 explanation instructions. The scaffolding instruction elicits more interactive and constructive responses,  
480 whereas the explanation instruction elicits more interactive and passive responses.

### 481 **3.4. Conclusions**

482 Recording brain activity from multiple participants simultaneously in ecologically  
483 valid settings is a nascent but promising field of research. We investigated interactive  
484 learning using fNIRS hyperscanning in a naturalistic learning situation, and found that  
485 verbal instruction modulates learning via brain-to-brain coupling between instructors  
486 and learners, which was driven by dynamic scaffolding representations. Importantly,  
487 brain-to-brain coupling was effective to discriminate between different instructional  
488 approaches and predict learning outcomes. Together, our findings suggest that  
489 brain-to-brain coupling may be a pedagogically informative implicit measure that  
490 tracks learning throughout ongoing dynamic instructor-learner interactions.

491

## 492 **4. Methods**

### 493 **4.1. Participants**

494 Twenty-four dyads ( $n = 48$ , all females, mean age =  $21.46 \pm 2.75$  years) were  
495 recruited to participate in the study. Each dyad consisted of one learner and one  
496 instructor. Each instructor taught the learner in a one-to-one way. The instructors  
497 (mean age =  $22.58 \pm 2.75$  years) had all received graduate training in psychology, had  
498 at least 1-year of instructional experience, and were familiar with the learning content,  
499 whereas the learners (mean age =  $20.33 \pm 2.30$  years) in our sample majored in  
500 non-psychology related fields and had not been exposed to the content. All  
501 participants were healthy and right-handed and were recruited through advertisements.  
502 Each participant gave informed consent prior to the experiment and was paid for  
503 participation. The study was approved by the University Committee of Human  
504 Research Protection (HR 044-2017), East China Normal University.

#### 505 **4.2. Tasks and materials**

506 The task used in the present fNIRS-based hyperscanning study was a conceptual  
507 learning task, which involved mastering two sets of materials, each explaining four  
508 psychological terms pertaining to an overarching concept. The material was chosen to  
509 be novel and attractive to non-psychology majors and teachable within 10 – 20  
510 minutes. The sets centered around the concepts of *reinforcement* and *transfer*. These  
511 concepts were chosen from a classic national standard textbook (Educational  
512 Psychology: A Book for Teachers, Wu & Hu, 2003). These two concepts belong to the  
513 similar topic (i.e., learning psychology) and occupy a similar instructional period (i.e.,  
514 1~2 sessions). The *reinforcement* set consisted of teaching positive reinforcement,  
515 negative reinforcement, punishment, and retreat (Set 1), and *transfer* consisted of  
516 near-transfer, far-transfer, lateral-transfer, and vertical-transfer (Set 2). This design  
517 allowed us to provide different learning content for the two within-participant  
518 instructional strategies (i.e., scaffolding vs. explanation), without repeating any  
519 content. Learning outcomes did not differ between the two sets of concepts, and were  
520 thus pooled together in the results reported below.

521 All instructors were informed and trained by experimenters two days prior to the

522 experiment. Training examples were selected from the textbook's training section.  
523 Each example consisted of instructional goals, instructional difficulties, general  
524 instructional processes, and detailed instructional scripts. Such instructional scripts  
525 were composed and adapted with the help of two psychological experts with at least  
526 20 years of instructional experience at the university level. Instructors were required  
527 to prepare instruction at home for 2 days. They then practiced with each other in the  
528 lab until they were satisfied with their own instructional performance in both the  
529 scaffolding and explanation conditions (they spent approximately the same amount of  
530 time training for both types of instructions). Then they demonstrated instruction to the  
531 experimenter in a one-to-one way until their performance met the established standard  
532 requirements: the length of teaching, the speed of speech, and consistency with the  
533 instructional processes and scripts (Liu et al., 2019).

#### 534 **4.3. Experimental factors**

535 We manipulated one within-participant variable and one between-participant variable.  
536 The within-participant variable was the Instructional Strategy (scaffolding vs.  
537 explanation). Following the scripts, the instructor using a scaffolding strategy would  
538 guide the learner in a Q&A manner along the following lines (one representative  
539 example, translated from Chinese):

- 540 - *Instructor: How can one provide positive reinforcement?*
- 541 - *Learner: ...By rewarding positive behavior?*
- 542 - *Instructor: Bingo! Could you please give an example?*
- 543 - *Learner: My sister gave me some candies after I cleaned my room.*
- 544 .....

545 For the explanation strategy, the instructor would explain each concept to the  
546 learner and provide examples. The following interaction provides a representative  
547 example of explanatory behavior:

- 548 - *Instructor: Positive reinforcement refers to rewarding goal-directed behavior*  
549 *to increase its frequency. Do you see what I mean?*

550 - *Learner: I am not sure whether I understand it correctly. Could you please*  
551 *explain it a bit more?*

552 - *Instructor: For example, my mom cooks my favorite food for me when I pass*  
553 *exams.*

554 - *Learner: That clarifies it.*

555 .....

556 The between-participant variable was Instructional Personalization (personalized  
557 vs. non-personalized; i.e., whether the instructor customizes their instructions to the  
558 learner's aptitude and ability as established via a pre-test). Instructions might be  
559 intrinsically personalized: for example, instructors often monitor learners'  
560 comprehension and guide their understanding during face-to-face interactions. For  
561 instructors to be able to customize their instructions, learners have to inform them  
562 about their lack of understanding. Therefore, we exogenously manipulated  
563 Instructional Personalization. For half of the participants ( $n = 12$  dyads), the learner's  
564 pre-test results (i.e., prior knowledge level) of the eight concepts (4 from Set 1 and 4  
565 from Set 2) were provided to the instructor. The instructor was then asked to adapt  
566 their instruction to suit the needs of each learner (e.g., allocate more time to the  
567 teaching of a concept if the learner had difficulty learning it). For the  
568 non-personalized group ( $n = 12$  dyads), the instructor was provided no information  
569 about the learner.

#### 570 **4.4. Procedures**

571 The task included two blocks, each split into a resting-state phase and an interactive  
572 learning phase (**Fig. 1A**). The inter-block interval was approximately 1 minute.  
573 During the initial resting-state phase (3 min), both participants (sitting face-to-face,  
574 0.8 meters apart) were asked to relax and to remain still. This 3-min resting phase  
575 served as the baseline.

576 The resting-state phase was immediately followed by the interactive-learning  
577 phase (8 min), where the learner and instructor engaged in interactive learning either



578 in a personalized (n =12 dyads) or non-personalized (n = 12 dyads) way (Instructional  
579 Personalization, **Fig. 1B**). For each group, the experimental procedure consisted of  
580 one of the following combinations of learning content and Instructional Strategy: (i)  
581 *reinforcement* with scaffolding (block 1) + *transfer* with explanation (block 2), (ii)  
582 *reinforcement* with explanation (block 1) + *transfer* with scaffolding (block 2). Block  
583 order was counterbalanced.

584 During the experiment, learners' and instructors' brain activity was recorded  
585 simultaneously via fNIRS-based hyperscanning at prefrontal and left temporoparietal  
586 regions (**Fig. 1C**). A digital video camera (Sony, HDR-XR100, Sony Corporation,  
587 Tokyo, Japan) was used to record the behavioral interactions between participant  
588 dyads. The acquisition of video data and fNIRS data was synchronized with a  
589 real-time audio-video cable connecting the camera to the ETG-7100 equipment. The  
590 camera recordings were used to classify (following the experiment) behavior as either  
591 scaffolding or explanatory behaviors.

#### 592 **4.5. Learning tests and outcome analysis**

593 Learners' knowledge of psychological concepts was tested immediately before the  
594 onset of the resting-state phase and after the end of the interactive-learning phase.  
595 Relevant to Reinforcement and Transfer, 8 definitions, 16 true-false items and 4 short  
596 answer questions were selected from textbooks to compose a testing bank. These  
597 items were randomly split into two halves, one for the pre-test and the other for the  
598 post-test. Results from 9 participants who were not involved in the fNIRS study  
599 showed that the difficulty levels did not differ between the pre- and post-tests ( $t_{(8)} =$   
600  $0.01, p = 0.99$ ). The learners had a time limitation of 20 min to finish each of the tests  
601 (Zheng et al., 2018).

602 The performance of learners in the pre- and post- tests was scored by two separate  
603 other raters who were blind to the group assignment. Three question types (i.e.,  
604 definitions, true-false items, simple answer questions) were evaluated. For each  
605 learner, inter-coder reliability was calculated by the intra-class correlation on scores

606 for definitions and simple answer questions (ranging from 0.77 to 0.91). Rating scores  
607 were averaged across the two raters. The sum of the judgments made on all three  
608 question types (for a given learner) was considered as the index of overall learning  
609 performance [maximum score: 4 (for 4 definitions) + 16 (for 8 true-false items) + 10  
610 (for 2 simple answer questions) = 30 points]. Pre-test scores did not differ between  
611 any of the conditions ( $F_s < 1.60$ ,  $p_s > 0.17$ ). For all subsequent analyses, learning  
612 outcomes were quantified as the difference pre-learning scores and post-learning  
613 scores. A mixed-design repeated measures ANOVA was conducted on the learning  
614 outcomes, with Instructional Personalization (personalized vs. non-personalized) as a  
615 between-subject variable and Instructional Strategy (scaffolding vs. explanation) as a  
616 within-subject variable.

#### 617 **4.6. Image acquisition**

618 An ETG-7100 optical topography system (Hitachi Medical Corporation, Japan) was  
619 used for brain data acquisition. The absorption of near-infrared light (two wavelengths:  
620 695 and 830 nm) was measured with a sampling rate of 10 Hz. The oxyhemoglobin  
621 (HbO) and deoxyhemoglobin (HbR) were obtained through the modified  
622 Beer-Lambert law. We focused our analyses on the HbO concentration, for which the  
623 signal-to-noise ratio is better than HbR (Mahmoudzadeh et al., 2013). A number of  
624 fNIRS-based hyperscanning reports have used this indicator to compute of  
625 brain-to-brain coupling (e.g., Cheng et al., 2015; Dai et al., 2018; Jiang et al., 2012,  
626 2015; Pan et al., 2017; Tang et al., 2015).

627 Two optode probe sets were used to cover each participant's prefrontal and left  
628 temporoparietal regions (**Fig. 1C**), which have been previously associated with  
629 information exchanges between instructors and learners during interactive learning  
630 (Holper et al., 2013; Pan et al., 2018; Takeuchi et al., 2017; Zheng et al., 2018). One 3  
631 × 5 optode probe set (eight emitters and seven detectors forming 22 measurement  
632 points with 3 cm optode separation) was placed over the prefrontal area. The middle  
633 optode of the lowest probe row of the patch was placed at Fpz (**Fig. 1C**), following

634 the international 10-20 system (Okamoto et al., 2004). The middle probe set columns  
635 were placed along the sagittal reference curve. The other  $4 \times 4$  probe set (eight  
636 emitters and eight detectors forming 24 measurement points with 3 cm optode  
637 separation) was placed over the left temporoparietal regions (reference optode was  
638 placed at P5, **Fig. 1C**). The correspondence between the NIRS channels (CHs) and the  
639 measured points on the cerebral cortex was determined using a virtual registration  
640 approach (Singh et al., 2005; Tsuzuki et al., 2007).

#### 641 **4.7. Imaging-data analyses**

##### 642 **4.7.1. Analysis step A: Brain-to-brain coupling**

643 Data collected during the resting-state phase (3 min, served as the baseline) and the  
644 interactive-learning phase (8 min, served as the task) in each block were entered into  
645 the brain-to-brain coupling analysis (**Fig. 1D**). A principal component spatial filter  
646 algorithm was used to remove systemic components such as blood pressure,  
647 respiratory and blood flow variation from the fNIRS data (Zhang et al., 2016). To  
648 remove head motion artifacts, we used a “Correlation Based Signal Improvement”  
649 approach (Cui et al., 2010).

650 We then employed a wavelet transform coherence (WTC) analysis to estimate  
651 brain-to-brain coupling. The WTC of signals  $i(t)$  and  $j(t)$  was defined by:

$$652 \quad \text{WTC}(t, s) = \frac{|\langle s^{-1}W^{ij}(t,s) \rangle|^2}{|\langle s^{-1}W^i(t,s) \rangle|^2 |\langle s^{-1}W^j(t,s) \rangle|^2},$$

653 where  $t$  denotes the time,  $s$  indicates the wavelet scale,  $\langle \cdot \rangle$  represents a smoothing  
654 operation in time and scale, and  $W$  is the continuous wavelet transform (see Grinsted  
655 et al., 2004 for details). Our brain-to-brain coupling analysis was conducted in a  
656 data-driven manner and entailed three sub-steps:

657 *Step 1: Does interactive learning lead to enhanced brain-to-brain coupling*  
658 *compared to baseline?*

659 As a first step, we estimated whether brain-to-brain coupling was enhanced  
660 during the interactive learning task (estimated by WTC) compared to baseline.

661 Time-averaged brain-to-brain coupling (also averaged across channels in each dyad)  
662 was compared between the resting phase (i.e. baseline session) and the interactive  
663 learning phase (i.e. task session) using a series of paired sample *t*-tests, one for each  
664 frequency band (frequency range: 0.01 – 1 Hz, Nozawa et al., 2016). This analysis  
665 yielded a series of *p*-values that were FDR corrected ( $p < 0.05$ ). This analysis enables  
666 the identification of frequency characteristic, which help us determine the frequency  
667 of interest (FOI) for subsequent analyses.

668 To verify if the enhanced brain-to-brain coupling was dyad-specific, data from all  
669 48 participants were reshuffled in a pseudo-random way so that 24 new dyads were  
670 created (e.g., time series from instructor #1 were paired with those from learner #3)  
671 (**Fig. 3E**). Then, the above brain-to-brain coupling analysis was performed again to  
672 obtain brain-to-brain coupling for pseudo-pairs.

673 *Step 2: Does task-related brain-to-brain coupling enhancement differ across the*  
674 *experimental conditions?*

675 We averaged brain-to-brain coupling within each identified FOI and compared all  
676 conditions. We computed an index of task-related brain-to-brain coupling by  
677 subtracting the averaged coupling during the resting phase from that during the  
678 interactive learning phase. Fisher z transformation was applied to the task-related  
679 coupling values to generate a normal distribution. The resulting values for each  
680 channel were then submitted into an Instructional Strategy (scaffolding vs.  
681 explanation) × Instructional Personalization (personalized vs. non-personalized)  
682 mixed-design ANOVA. Parallel analyses were conducted separately in each FOI. The  
683 resulting *p* values were FDR-corrected for multiple comparisons. The results yielded  
684 *F* maps for each FOI. These *F* maps were visualized using BrainNet Viewer (Xia et al.,  
685 2013).

686 *Step 3: Is condition-specific brain-to-brain coupling predictive of learning?*

687 Finally, we assessed behavior-brain relationships. Pearson correlational analyses  
688 were employed to test the relationship between task-related brain-to-brain coupling  
689 from significant channels and learning outcomes.

#### 690 **4.7.2. Analysis step B: Brain-to-brain coupling segmentation**

691 Following the brain-to-brain coupling analyses, we grouped and averaged the adjacent  
692 CHs that showed significant brain-to-brain coupling as channels of interest. The time  
693 course of brain-to-brain coupling in the channels of interest was down-sampled to 1  
694 Hz to obtain point-to-frame correspondence between the time series and video  
695 recordings (**Figs. 5A&B**).

696 Two graduate students were recruited to independently code instructional  
697 behaviors in the interactive-learning phase using the video-recording data. The two  
698 coders underwent a weeklong training program by an educational expert (with 28  
699 years of instructional experience in the field of education) to correctly identify  
700 instructional behaviors. Two types of instructional behaviors were categorized for  
701 each Instructional Strategy: for the scaffolding condition, there were (i) scaffolding  
702 behaviors, such as asking key questions, providing feedback and hints, prompting,  
703 simplifying problems, and (ii) other non-scaffolding instructional behaviors, i.e., those  
704 segments in the videos where scaffolding did not occur; for the explanation condition,  
705 there were (i) explanatory behaviors, such as giving detailed definitions, providing  
706 prefabricated materials, and information clarification, and (ii) other non-explanatory  
707 instructional behaviors, i.e., those segments in the videos where explanation did not  
708 occur.

709 Each one-second (s) video fragment (from the 8 minutes during the  
710 interactive-learning phase) was coded as either containing scaffolding behaviors or  
711 non-scaffolding instructional behaviors in the scaffolding condition; and as either  
712 consisting of explanatory behaviors or non-explanatory instructional behaviors in the  
713 explanation condition. For all coding activities, inter-coder reliability was calculated  
714 by the intra-class correlation (Werts et al., 1974). Inter-coder reliability was 0.87 for  
715 the scaffolding behaviors (vs. non-scaffolding instructional behaviors) in the  
716 scaffolding condition, and 0.81 for the explanatory behaviors (vs. non-explanatory  
717 instructional behaviors) in the explanation condition. If there was an inconsistency,  
718 the two coders discussed it and came to an agreement.

719       Based on the results of the coding procedures mentioned above, we categorized  
720 the segments of brain-to-brain coupling associated with different video-coded  
721 instructional behaviors (**Figs. 5A&B**). We subtracted brain-to-brain coupling during  
722 the rest session (baseline) from these segments of brain-to-brain coupling to obtain the  
723 task-related coupling. Contrasts between task-related brain-to-brain coupling  
724 associated with different video-coded instructional behaviors were obtained using a  
725 series of paired-sample *t*-tests.

#### 726 **4.7.3. Analysis step C: Brain-to-brain coupling prediction**

727 Finally, we explored whether brain-to-brain coupling allowed us to predict if an  
728 instructor employed the *scaffolding* or *explanation* strategy, using a decoding analysis  
729 (Dai et al., 2018; Jiang et al., 2015). The analysis details and strategies can be  
730 described as follows.

731       *Classification features and labels.* The time-averaged brain-to-brain coupling  
732 values at channels of interest were used as classification features. We first averaged  
733 the brain-to-brain coupling across the whole time series, resulting in time-averaged  
734 coupling for each channel. We focused on the channel(s) that exhibited significant  
735 task-related coupling (task vs. baseline; Goldstein et al., 2018). Instructional  
736 Strategies (i.e., *scaffolding* or *explanation*) were used as class labels.

737       *Classification algorithm.* Brain-to-brain coupling features were incorporated into  
738 a logistic regression algorithm. Logistic regression is a supervised machine-learning  
739 algorithm that has been previously used to predict behavioral measures with  
740 neuroimaging data (e.g., Ryali et al., 2010). The aim of logistic regression-based  
741 machine learning is to find the best fitting model that describes the relationship  
742 between the dichotomous features of the dependent variable and independent  
743 variables (Yan et al., 2004).

744       *Classification performance.* Classification performance was assessed using the  
745 standard metric of area under the receiver operating characteristic curve (AUC). The  
746 AUC is one of the most common quantitative indexes (Faraggi and Reiser, 2002;

747 Hanley and McNeil, 1982), which illustrates the sensitivity and specificity for the  
748 classifier output. It has been successfully used to quantify the accuracy of the  
749 prediction in many neuroimaging studies (e.g., Cohen et al., 2018; Ki et al., 2016).

750 A permutation test was used to determine whether the obtained AUC was  
751 significantly larger than that generated by chance. Chance level of the AUC was  
752 determined by randomly shuffling the labels (*scaffolding* or *explanation*) for the  
753 brain-to-brain coupling values. Significant levels ( $p < 0.05$ ) were calculated by  
754 comparing the correct AUC from the real labels with 10000 renditions of randomized  
755 labels.

756 *Additional analyses.* Finally, we tested whether decoding based on brain-to-brain  
757 coupling generated a better classification of instructional behavior than decoding  
758 based on individual brain activation. The raw fNIRS data were first preprocessed  
759 following the same procedure described in *Analysis Step A*. Clean (task-related)  
760 signals were then converted into  $z$ -scores using the mean and the standard deviation of  
761 the signals recorded during rest (baseline). Normalized intra-brain activity values at  
762 channels of interest in both instructors and learners were extracted as classification  
763 features. The parallel decoding analyses were then repeated as described above.

## 764 **Acknowledgment**

765 We'd like to thank Philippe Peigneux for his valuable help and comments on earlier  
766 drafts. This work was sponsored by the National Natural Science Foundation of China  
767 (31872783), the General Project of Humanities and Social Sciences of the Ministry of  
768 Education (19A10332020), the China Scholarship Council (201706140082), and the  
769 outstanding doctoral dissertation cultivation plan of action of East China Normal  
770 University (YB2016011).

## 771 **References**

772 [1] Amoruso, L., Finisguerra, A., & Urgesi, C. (2018). Contextualizing action observation in the  
773 predictive brain: causal contributions of prefrontal and middle temporal  
774 areas. *NeuroImage*, 177, 68-78.



- 775 [2] Baker, J. M., Liu, N., Cui, X., Vrticka, P., Saggar, M., Hosseini, S. H., & Reiss, A. L. (2016). Sex  
776 differences in neural and behavioral signatures of cooperation revealed by fNIRS  
777 hyperscanning. *Scientific Reports*, 6, 26492.
- 778 [3] Bevilacqua, D., Davidesco, I., Wan, L., Oostrik, M., Chaloner, K., Rowland, J., ... & Dikker, S.  
779 (2019). Brain-to-brain synchrony and learning outcomes vary by student–teacher dynamics:  
780 Evidence from a real-world classroom electroencephalography study. *Journal of Cognitive*  
781 *Neuroscience*, 31(3), 401-411.
- 782 [4] Busch, N. A., & VanRullen, R. (2010). Spontaneous EEG oscillations reveal periodic sampling of  
783 visual attention. *Proceedings of the National Academy of Sciences*, 107(37), 16048-16053.
- 784 [5] Chen, J. (2007). Teacher’s conceptions of excellent teaching in middle school in the north of  
785 China. *Asia Pacific Education Review*, 8(2), 288-297.
- 786 [6] Chen, J. E., & Glover, G. H. (2015). BOLD fractional contribution to resting-state functional  
787 connectivity above 0.1 Hz. *Neuroimage*, 107, 207-218.
- 788 [7] Cheng, X., Li, X., & Hu, Y. (2015). Synchronous brain activity during cooperative exchange  
789 depends on gender of partner: A fNIRS-based hyperscanning study. *Human Brain*  
790 *Mapping*, 36(6), 2039-2048.
- 791 [8] Chi, M. T. (2013). Learning from observing an expert’s demonstration, explanations, and  
792 dialogues. *Expertise and skill acquisition: The impact of William G. Chase*, 1-28.
- 793 [9] Chi, M. T., & Roy, M. (2010). How adaptive is an expert human tutor?. In *International*  
794 *Conference on Intelligent Tutoring Systems* (pp. 401-412). Springer, Berlin, Heidelberg.
- 795 [10] Chi, M. T., Siler, S. A., & Jeong, H. (2004). Can tutors monitor students’ understanding  
796 accurately?. *Cognition and Instruction*, 22(3), 363-387.
- 797 [11] Chi, M. T., & Wylie, R. (2014). The ICAP framework: Linking cognitive engagement to active  
798 learning outcomes. *Educational Psychologist*, 49(4), 219-243.
- 799 [12] Clark, R. C., & Mayer, R. E. (2016). *E-learning and the science of instruction: Proven guidelines*  
800 *for consumers and designers of multimedia learning*. John Wiley & Sons.
- 801 [13] Cohen, S. S., Jens, M., Gad, T., Denise, R., Stella, F. A. L., & Simon, H., et al. (2018). Neural  
802 engagement with online educational videos predicts learning performance for individual  
803 students. *Neurobiology of Learning and Memory*, 155, 60-64.
- 804 [14] Cui, X., Bray, S., & Reiss, A. L. (2010). Functional near infrared spectroscopy (fNIRS) signal  
805 improvement based on negative correlation between oxygenated and deoxygenated hemoglobin  
806 dynamics. *Neuroimage*, 49(4), 3039-3046.
- 807 [15] Cui, X., Stetson, C., Montague, P. R., & Eagleman, D. M. (2009). Ready... go: Amplitude of the  
808 fMRI signal encodes expectation of cue arrival time. *PLoS biology*, 7(8), e1000167.
- 809 [16] Dai, B., Chen, C., Long, Y., Zheng, L., Zhao, H., Bai, X., ... & Ding, G. (2018). Neural  
810 mechanisms for selectively tuning in to the target speaker in a naturalistic noisy situation. *Nature*  
811 *Communications*, 9(1), 2405.
- 812 [17] Dikker, S., Silbert, L. J., Hasson, U., & Zevin, J. D. (2014). On the same wavelength:  
813 Predictable language enhances speaker-listener brain-to-brain synchrony in posterior superior  
814 temporal gyrus. *Journal of Neuroscience*, 34(18), 6267-6272.
- 815 [18] Duffy, G. G., Roehler, L. R., Meloth, M. S., & Vavrus, L. G. (1986). Conceptualizing instructional  
816 explanation. *Teaching and Teacher Education*, 2(3), 197-214.
- 817 [19] Düzel, E., Penny, W. D., & Burgess, N. (2010). Brain oscillations and memory. *Current Opinion*  
818 *in Neurobiology*, 20(2), 143-149.



- 819 [20] Faraggi, D., & Reiser, B. (2002). Estimation of the area under the ROC curve. *Statistics in*  
820 *Medicine*, 21(20), 3093-3106.
- 821 [21] Garrod, S. , & Pickering, M. J. . (2009). Joint action, interactive alignment, and dialog. *Topics*  
822 *in Cognitive Science*, 1(2), 292-304.
- 823 [22] Giraud, A. L., & Poeppel, D. (2012). Cortical oscillations and speech processing: Emerging  
824 computational principles and operations. *Nature Neuroscience*, 15(4), 511-517.
- 825 [23] Gohel, S. R., & Biswal, B. B. (2015). Functional integration between brain regions at rest occurs  
826 in multiple-frequency bands. *Brain Connectivity*, 5(1), 23-34.
- 827 [24] Grinsted, A., Moore, J. C., & Jevrejeva, S. (2004). Application of the cross wavelet transform and  
828 wavelet coherence to geophysical time series. *Nonlinear Processes in Geophysics*, 11(5/6),  
829 561-566.
- 830 [25] Hanley, J. A., & McNeil, B. J. (1982). The meaning and use of the area under a receiver operating  
831 characteristic (ROC) curve. *Radiology*, 143(1), 29-36.
- 832 [26] Hartstra, E., Kühn, S., Verguts, T., & Brass, M. (2011). The implementation of verbal instructions:  
833 An fMRI study. *Human Brain Mapping*, 32(11), 1811-1824.
- 834 [27] Hasson, U., & Frith, C. D. (2016). Mirroring and beyond: Coupled dynamics as a generalized  
835 framework for modelling social interactions. *Philosophical Transactions of the Royal Society B:*  
836 *Biological Sciences*, 371(1693), 20150366.
- 837 [28] Holper, L., Goldin, A. P., Shalóm, D. E., Battro, A. M., Wolf, M., & Sigman, M. (2013). The  
838 teaching and the learning brain: A cortical hemodynamic marker of teacher-student interactions in  
839 the Socratic dialog. *International Journal of Educational Research*, 59, 1-10.
- 840 [29] Jiang, J., Chen, C., Dai, B., Shi, G., Ding, G., Liu, L., & Lu, C. (2015). Leader emergence through  
841 interpersonal neural synchronization. *Proceedings of the National Academy of Sciences*, 112(14),  
842 4274-4279.
- 843 [30] Jiang, J., Dai, B., Peng, D., Zhu, C., Liu, L., & Lu, C. (2012). Neural synchronization during  
844 face-to-face communication. *Journal of Neuroscience*, 32(45), 16064-16069.
- 845 [31] Jumaat, N. F., & Tasir, Z. (2016). A framework of metacognitive scaffolding in learning authoring  
846 system through facebook. *Journal of Educational Computing Research*, 54(5), 619-659.
- 847 [32] Ki, J. J., Kelly, S. P., & Parra, L. C. (2016). Attention strongly modulates reliability of neural  
848 responses to naturalistic narrative stimuli. *Journal of Neuroscience*, 36(10), 3092-3101.
- 849 [33] Kleickmann, T., Tröbst, S., Jonen, A., Vehmeyer, J., & Möller, K. (2016). The effects of expert  
850 scaffolding in elementary science professional development on teachers' beliefs and motivations,  
851 instructional practices, and student achievement. *Journal of Educational Psychology*, 108(1),  
852 21-42.
- 853 [34] Lam, R., & Muldner, K. (2017). Manipulating cognitive engagement in preparation-to-collaborate  
854 tasks and the effects on learning. *Learning and Instruction*, 52, 90-101.
- 855 [35] Liu, T., Saito, H., & Oi, M. (2015). Role of the right inferior frontal gyrus in turn-based  
856 cooperation and competition: a near-infrared spectroscopy study. *Brain and Cognition*, 99, 17-23.
- 857 [36] Leinhardt, G., & Steele, M. D. (2005). Seeing the complexity of standing to the side: Instructional  
858 dialogues. *Cognition and Instruction*, 23(1), 87-163.
- 859 [37] Leong, V., Byrne, E., Clackson, K., Georgieva, S., Lam, S., & Wass, S. (2017). Speaker gaze  
860 increases information coupling between infant and adult brains. *Proceedings of the National*  
861 *Academy of Sciences*, 114(50), 13290-13295.
- 862 [38] Mahmoudzadeh, M., Dehaene-Lambertz, G., Fournier, M., Kongolo, G., Goudjil, S., Dubois, J., ...

- 863 & Wallois, F. (2013). Syllabic discrimination in premature human infants prior to complete  
864 formation of cortical layers. *Proceedings of the National Academy of Sciences*, *110*(12),  
865 4846-4851.
- 866 [39] Marchiori, D., & Warglien, M. (2008). Predicting human interactive learning by regret-driven  
867 neural networks. *Science*, *319*(5866), 1111-1113.
- 868 [40] Meyer, M. L., Davachi, L., Ochsner, K. N., & Lieberman, M. D. (2018). Evidence that default  
869 network connectivity during rest consolidates social information. *Cerebral Cortex*.  
870 doi: 10.1093/cercor/bhy071.
- 871 [41] Norman, K. A., Polyn, S. M., Detre, G. J., & Haxby, J. V. (2006). Beyond mind-reading:  
872 Multi-voxel pattern analysis of fMRI data. *Trends in Cognitive Sciences*, *10*(9), 424-430.
- 873 [42] Nozawa, T., Sasaki, Y., Sakaki, K., Yokoyama, R., & Kawashima, R. (2016). Interpersonal  
874 frontopolar neural synchronization in group communication: An exploration toward fNIRS  
875 hyperscanning of natural interactions. *Neuroimage*, *133*, 484-497.
- 876 [43] Ohara, S., Mima, T., Baba, K., Ikeda, A., Kunieda, T., Matsumoto, R., ... & Hori, T. (2001).  
877 Increased synchronization of cortical oscillatory activities between human supplementary motor  
878 and primary sensorimotor areas during voluntary movements. *Journal of Neuroscience*, *21*(23),  
879 9377-9386.
- 880 [44] Okamoto, M., Dan, H., Sakamoto, K., Takeo, K., Shimizu, K., Kohno, S., ... & Dan, I. (2004).  
881 Three-dimensional probabilistic anatomical cranio-cerebral correlation via the international 10–20  
882 system oriented for transcranial functional brain mapping. *Neuroimage*, *21*(1), 99-111.
- 883 [45] Olsson, A., & Phelps, E. A. (2007). Social learning of fear. *Nature Neuroscience*, *10*(9),  
884 1095-1102.
- 885 [46] Pan, Y., Novembre, G., Song, B., Li, X., & Hu, Y. (2018). Interpersonal synchronization of  
886 inferior frontal cortices tracks social interactive learning of a song. *Neuroimage*, *183*, 280-290.
- 887 [47] Reindl, V., Gerloff, C., Scharke, W., & Konrad, K. (2018). Brain-to-brain synchrony in  
888 parent-child dyads and the relationship with emotion regulation revealed by fNIRS-based  
889 hyperscanning. *Neuroimage*, *178*, 493-502.
- 890 [48] Renkl, A., Hilbert, T., Schworm, S., & Reiss, K. (2007). Cognitive skill acquisition from complex  
891 examples: A taxonomy of examples and tentative instructional guidelines. *Studies on the*  
892 *Educational Quality of Schools*, 239-249.
- 893 [49] Ruge, H., & Wolfensteller, U. (2009). Rapid formation of pragmatic rule representations in the  
894 human brain during instruction-based learning. *Cerebral Cortex*, *20*(7), 1656-1667.
- 895 [50] Ryali, S., Supekar, K., Abrams, D. A., & Menon, V. (2010). Sparse logistic regression for  
896 whole-brain classification of fMRI data. *NeuroImage*, *51*(2), 752-764.
- 897 [51] Schilbach, L., Timmermans, B., Reddy, V., Costall, A., Bente, G., Schlicht, T., & Voegeley, K.  
898 (2013). Toward a second-person neuroscience 1. *Behavioral and Brain Sciences*, *36*(4), 393-414.
- 899 [52] Shamay-Tsoory, S. G., Saporta, N., Marton-Alper, I. Z., & Gvirts, H. Z. (2019). Herding brains: A  
900 core neural mechanism for social alignment. *Trends in Cognitive Sciences*, *23*(3), 174-186.
- 901 [53] Singh, A. K., Okamoto, M., Dan, H., Jurcak, V., & Dan, I. (2005). Spatial registration of  
902 multichannel multi-subject fNIRS data to MNI space without MRI. *Neuroimage*, *27*(4), 842-851.
- 903 [54] Stephens, G. J., Silbert, L. J., & Hasson, U. (2010). Speaker-listener neural coupling  
904 underlies successful communication. *Proceedings of the National Academy of*  
905 *Sciences*, *107*(32), 14425-14430.
- 906 [55] Takeuchi, N., Mori, T., Suzukamo, Y., & Izumi, S. I. (2017). Integration of teaching processes and

- 907 learning assessment in the prefrontal cortex during a video game teaching–learning task. *Frontiers*  
908 *in Psychology*, 7, 2052.
- 909 [56] Tang, H., Mai, X., Wang, S., Zhu, C., Krueger, F., & Liu, C. (2015). Interpersonal brain  
910 synchronization in the right temporo-parietal junction during face-to-face economic  
911 exchange. *Social Cognitive and Affective Neuroscience*, 11(1), 23-32.
- 912 [57] Thompson, J., & Parasuraman, R. (2012). Attention, biological motion, and action  
913 recognition. *Neuroimage*, 59(1), 4-13.
- 914 [58] Tsuzuki, D., Jurcak, V., Singh, A. K., Okamoto, M., Watanabe, E., & Dan, I. (2007). Virtual  
915 spatial registration of stand-alone fNIRS data to MNI space. *Neuroimage*, 34(4), 1506-1518.
- 916 [59] Van de Pol, J., Volman, M., & Beishuizen, J. (2010). Scaffolding in teacher–student interaction: A  
917 decade of research. *Educational Psychology Review*, 22(3), 271-296.
- 918 [60] Wass, R., & Golding, C. (2014). Sharpening a tool for teaching: The zone of proximal  
919 development. *Teaching in Higher Education*, 19(6), 671-684.
- 920 [61] Watanabe, K. (2013). Teaching as a dynamic phenomenon with interpersonal interactions. *Mind,*  
921 *Brain, and Education*, 7(2), 91-100.
- 922 [62] Webb, N. M., Ing, M., Kersting, N., & Nemer, K. M. (2006). Help seeking in cooperative learning  
923 groups. In S. A. Karabenick & R. S. Newman (Eds.), *Help seeking in academic settings: Goals,*  
924 *groups, and contexts* (pp. 45–88). Mahwah, NJ: Lawrence Erlbaum Associates.
- 925 [63] Wolfson, N. E., Cavanagh, T. M., & Kraiger, K. (2014). Older adults and technology-based  
926 instruction: Optimizing learning outcomes and transfer. *Academy of Management Learning &*  
927 *Education*, 13(1), 26-44.
- 928 [64] Xia, M., Wang, J., & He, Y. (2013). BrainNet Viewer: A network visualization tool for human  
929 brain connectomics. *PloS One*, 8(7), e68910.
- 930 [65] Yan, J., Koc, M., & Lee, J. (2004). A prognostic algorithm for machine performance assessment  
931 and its application. *Production Planning & Control*, 15(8), 796-801.
- 932 [66] Yang, D. Y. J., Rosenblau, G., Keifer, C., & Pelphrey, K. A. (2015). An integrative neural model of  
933 social perception, action observation, and theory of mind. *Neuroscience & Biobehavioral*  
934 *Reviews*, 51, 263-275.
- 935 [67] Zhang, X., Noah, J. A., & Hirsch, J. (2016). Separation of the global and local components in  
936 functional near-infrared spectroscopy signals using principal component spatial  
937 filtering. *Neurophotonics*, 3(1), 015004.
- 938 [68] Zheng, L., Chen, C., Liu, W., Long, Y., Zhao, H., Bai, X., ... & Chen, B. (2018). Enhancement of  
939 teaching outcome through neural prediction of the students' knowledge state. *Human Brain*  
940 *Mapping*, 39(7), 3046-3057.
